# Supplementary material for: Family-based whole exome sequencing of atopic dermatitis complicated with cataracts
Source: PubMed Central journal article supplement (PMC5601745; doi:10.18632/oncotarget.19739), 2017-07-31
Supplement: oncotarget-08-59446-s001.pdf [file oncotarget-08-59446-s001.pdf]

## **Family-based whole exome sequencing of atopic dermatitis complicated with cataracts**

### **SUPPLEMENTARY MATERIALS**

**Supplementary Table 1: Information about 162 genes both mutated in the patient and his father by whole exome sequencing**

See Supplementary File 1

**Supplementary Table 2: Information about 10 genes mutated in the patient without in his parents by whole exome sequencing**

See Supplementary File 2
